# Supplementary figures and images for: Behavioral Activation as a Treatment for Posttraumatic Stress Disorder Among Returning Veterans: A Randomized Trial
Source: Atypon-hosted journal article supplement (doi:10.1176/appi.ps.201800572), 2019-07-24

### CONSORT Flow Diagram

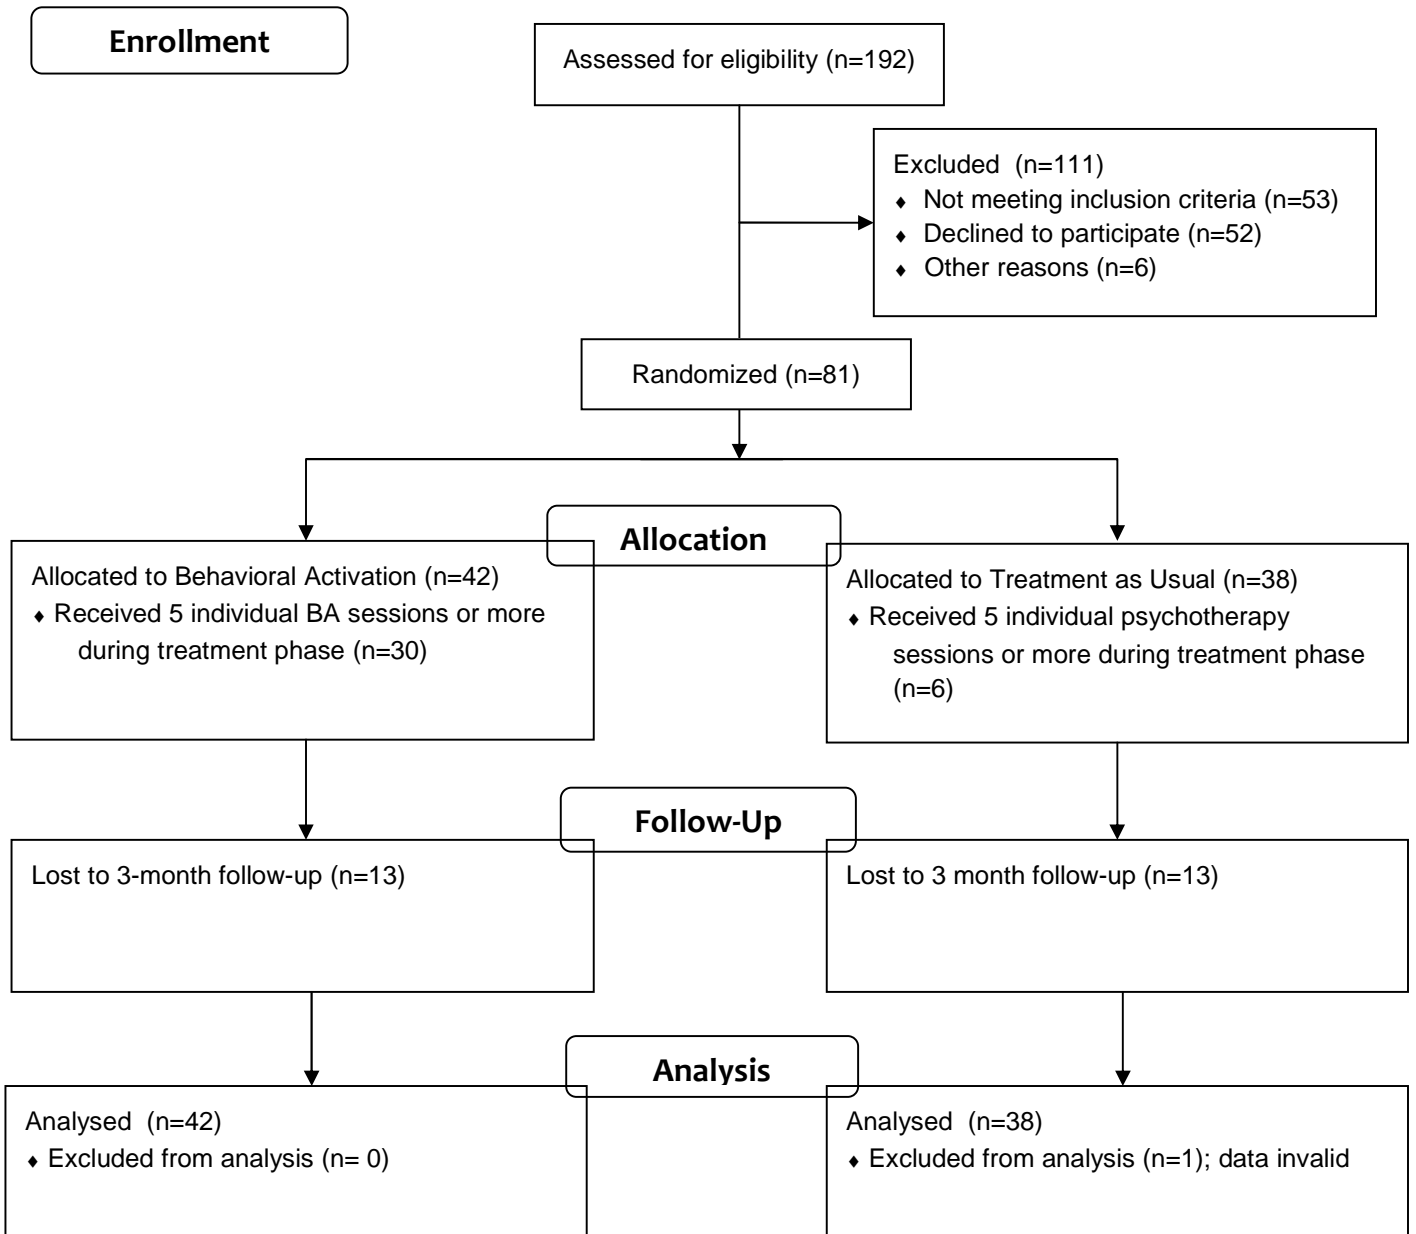

Supplement: appi.ps.201800572.ds001.pdf [file appi.ps.201800572.ds001.pdf]
